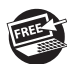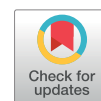

# Impact of Changes Over Time in Adipokines and Inflammatory Proteins on Changes in Insulin Sensitivity, $\beta$ -Cell Function, and Glycemia in Women With Previous Gestational Dysglycemia

*Diabetes Care* 2017;40:e101–e102 | <https://doi.org/10.2337/dc17-0781>

Ravi Retnakaran,<sup>1,2,3</sup> Chang Ye,<sup>1</sup>  
Philip W. Connelly,<sup>2,4</sup>  
Anthony J. Hanley,<sup>1,2,5</sup>  
Mathew Sermer,<sup>6</sup> and  
Bernard Zinman<sup>1,2,3</sup>

Adipokine dysregulation and subclinical inflammation are putative diabetogenic features of adiposity. However, while alterations in adipokines/inflammatory proteins can predict incident type 2 diabetes in longitudinal studies (1–3), evidence for causality is generally hindered by two limitations. First, there is a relative paucity of human data linking changes in adipokines/inflammatory proteins with changes in insulin sensitivity and  $\beta$ -cell function over time, as might be expected for causal mediators. Second, because obesity-induced changes in circulating proteins do not occur in isolation, the precise elucidation of causal mediators ideally requires consideration of multiple adipokines/inflammatory proteins simultaneously (as opposed to individually, as typically occurs in studies). Thus, to address these limitations, we evaluated changes over 2 years in adipokines (adiponectin, chemerin, retinol-binding protein 4 [RBP-4]) and inflammatory proteins (C-reactive protein [CRP], plasminogen activator inhibitor 1 [PAI-1]) in relation to changes in insulin sensitivity,  $\beta$ -cell function, and glycemia in women with varying degrees of recent gestational dysglycemia and hence a range of future risk of diabetes.

In this study, 339 women underwent a glucose challenge test (GCT) and oral glucose tolerance test (OGTT) in pregnancy, followed by repeat OGTT and measurement of adiponectin (Millipore), chemerin (Millipore), RBP-4 (ALPCO), CRP (Dade Behring), and PAI-1 (Invitrogen) at both 1 year and 3 years postpartum. The study protocol has been previously described in detail (4,5). On each OGTT, insulin sensitivity/resistance was measured by Matsuda index and HOMA of insulin resistance (HOMA-IR), and  $\beta$ -cell function was measured by the Insulin Secretion-Sensitivity Index-2 and insulinogenic index/HOMA-IR (4,5). The antepartum GCT/OGTT identified four gestational glucose tolerance groups (gestational diabetes mellitus, gestational impaired glucose tolerance, abnormal GCT with normal OGTT, normal GCT/OGTT), each of which predicts distinct trajectories of future risk of diabetes (5). On multiple linear regression analyses (Table 1), none of the adipokines/inflammatory proteins or their changes predicted  $\beta$ -cell function at 3 years (models A and B). Adiponectin at 1 year predicted insulin sensitivity (Matsuda index) at 3 years, while PAI-1 at 1 year and its change from 1 to 3 years were negative

predictors (model C). The same predictors emerged for HOMA-IR, in addition to CRP at 1 year and its change from 1 to 3 years (model D). For both fasting and 2-h glucose at 3 years (models E and F), significant independent predictors were the respective glucose measurement at baseline, BMI at 1 year, and change in BMI from 1 to 3 years. Of note, although weight gain is associated with both increased CRP and insulin resistance, the change in CRP was itself independently and inversely associated with HOMA-IR and fasting glucose at 3 years, likely reflecting the impact of adjustment for concurrent change in BMI and the other adipokines/inflammatory proteins. Finally, on logistic regression analysis with the same covariates, the only predictors of prediabetes/diabetes at 3 years were glucose intolerance at 1 year (odds ratio 8.12, 95% CI 3.98–16.56), BMI at 1 year (1.09, 1.02–1.16), and change in BMI (1.30, 1.05–1.59).

Thus, in fully adjusted models simultaneously evaluating all of the adipokines/inflammatory proteins and their changes over time, the dominant independent predictors of all of the metabolic outcomes were BMI at 1 year and its change from 1 to 3 years. The impact of adiposity

<sup>1</sup>Leadership Sinai Centre for Diabetes, Mount Sinai Hospital, Toronto, Canada

<sup>2</sup>Division of Endocrinology and Metabolism, University of Toronto, Toronto, Canada

<sup>3</sup>Lunenfeld-Tanenbaum Research Institute, Mount Sinai Hospital, Toronto, Canada

<sup>4</sup>Keenan Research Centre for Biomedical Science, St. Michael's Hospital, Toronto, Canada

<sup>5</sup>Department of Nutritional Sciences, University of Toronto, Toronto, Canada

<sup>6</sup>Department of Obstetrics and Gynaecology, Mount Sinai Hospital, Toronto, Canada

Corresponding author: Ravi Retnakaran, [ravi.retnakaran@sinaihealthsystem.ca](mailto:ravi.retnakaran@sinaihealthsystem.ca).

Received 18 April 2017 and accepted 15 May 2017.

© 2017 by the American Diabetes Association. Readers may use this article as long as the work is properly cited, the use is educational and not for profit, and the work is not altered. More information is available at <http://www.diabetesjournals.org/content/license>.

**Table 1—Significant independent predictors of six metabolic outcomes at 3 years postpartum**

| Outcome at 3 years*             | Significant predictors            | $\beta$   | t     | P       |
|---------------------------------|-----------------------------------|-----------|-------|---------|
| A. ISSI-2                       | ISSI-2 at 1 year                  | 0.552669  | 8.36  | <0.0001 |
|                                 | BMI at 1 year                     | -16.72522 | -3.32 | 0.001   |
| B. IGI/HOMA-IR                  | IGI/HOMA-IR at 1 year             | 0.007735  | 2.88  | 0.004   |
|                                 | BMI at 1 year                     | -0.028240 | -1.98 | 0.049   |
| C. Matsuda index                | Matsuda index at 1 year           | 0.022948  | 4.85  | <0.0001 |
|                                 | BMI at 1 year                     | -0.048227 | -7.28 | <0.0001 |
|                                 | Change in BMI from 1 to 3 years   | -0.100288 | -5.79 | <0.0001 |
|                                 | Asian ethnicity                   | -0.289391 | -3.37 | 0.0009  |
|                                 | Nonwhite non-Asian ethnicity      | -0.325275 | -4.12 | <0.0001 |
|                                 | Family history of diabetes        | -0.134457 | -2.56 | 0.01    |
|                                 | Adiponectin at 1 year             | 0.033599  | 4.09  | <0.0001 |
|                                 | PAI-1 at 1 year                   | -0.000117 | -2.59 | 0.01    |
|                                 | Change in PAI-1 from 1 to 3 years | -0.000138 | -2.87 | 0.005   |
| D. HOMA-IR                      | HOMA-IR at 1 year                 | 0.209465  | 5.41  | <0.0001 |
|                                 | BMI at 1 year                     | 0.046018  | 6.22  | <0.0001 |
|                                 | Change in BMI from 1 to 3 years   | 0.095050  | 5.15  | <0.0001 |
|                                 | Nonwhite non-Asian ethnicity      | 0.192813  | 2.30  | 0.02    |
|                                 | Family history of diabetes        | 0.115751  | 2.07  | 0.04    |
|                                 | Adiponectin at 1 year             | -0.034484 | -4.01 | <0.0001 |
|                                 | PAI-1 at 1 year                   | 0.000100  | 2.08  | 0.04    |
|                                 | Change in PAI-1 from 1 to 3 years | 0.000112  | 2.20  | 0.03    |
|                                 | CRP at 1 year                     | -0.024985 | -2.56 | 0.01    |
| Change in CRP from 1 to 3 years | -0.019536                         | -2.52     | 0.01  |         |
| E. Fasting glucose              | Fasting glucose at 1 year         | 0.617208  | 10.99 | <0.0001 |
|                                 | BMI at 1 year                     | 0.029007  | 4.43  | <0.0001 |
|                                 | Change in BMI from 1 to 3 years   | 0.070800  | 4.1   | <0.0001 |
|                                 | CRP at 1 year                     | -0.025304 | -2.77 | 0.006   |
|                                 | Change in CRP from 1 to 3 years   | -0.020363 | -2.79 | 0.006   |
| F. 2-h glucose                  | 2-h glucose at 1 year             | 0.640894  | 11.45 | <0.0001 |
|                                 | BMI at 1 year                     | 0.062188  | 2.61  | 0.01    |
|                                 | Change in BMI from 1 to 3 years   | 0.152248  | 2.43  | 0.02    |

\*Each of these six multiple linear regression models included the covariates age, ethnicity, family history of diabetes, duration of breastfeeding, BMI at 1 year, change in BMI from 1 to 3 years, the measure of the respective outcome variable at 1 year, and both the 1-year measure and change from 1 to 3 years for all of the following: adiponectin, chemerin, RBP-4, CRP, and PAI-1, IGI, insulinogenic index; ISSI-2, Insulin Secretion-Sensitivity Index-2.

on risk of diabetes in this population does not appear to be mediated by changes in adiponectin, chemerin, RBP-4, CRP, or PAI-1.

**Funding.** This study was supported by operating grants from the Canadian Institutes of Health Research (MOP-84206) and Canadian Diabetes

Association (CDA-OG-3-15-4924-RR). R.R. is supported by a Heart and Stroke Foundation of Ontario Mid-Career Investigator Award. A.J.H. holds a Tier-II Canada Research Chair in Diabetes Epidemiology. B.Z. holds the Sam and Judy Pencer Family Chair in Diabetes Research at Mount Sinai Hospital and University of Toronto.

**Duality of Interest.** No potential conflicts of interest relevant to this article were reported.

**Author Contributions.** R.R., P.W.C., A.J.H., M.S., and B.Z. designed and implemented the study. R.R. and C.Y. contributed to the analysis plan and interpretation of the data. C.Y. performed the statistical analyses. R.R. wrote the first draft. All authors critically revised the manuscript for important intellectual content. All authors approved the final manuscript. R.R. is the guarantor of this work and, as such, had full access to all of the data in the study and takes responsibility for the integrity of the data and the accuracy of the data analysis.

## References

- Pradhan AD, Manson JE, Rifai N, Buring JE, Ridker PM. C-reactive protein, interleukin 6, and risk of developing type 2 diabetes mellitus. *JAMA* 2001;286:327–334
- Festa A, D'Agostino R Jr, Tracy RP, Haffner SM; Insulin Resistance Atherosclerosis Study. Elevated levels of acute-phase proteins and plasminogen activator inhibitor-1 predict the development of type 2 diabetes: the Insulin Resistance Atherosclerosis Study. *Diabetes* 2002;51:1131–1137
- Li S, Shin HJ, Ding EL, van Dam RM. Adiponectin levels and risk of type 2 diabetes: a systematic review and meta-analysis. *JAMA* 2009;302:179–188
- Bajaj H, Ye C, Hanley AJ, et al. Prior lactation reduces future diabetic risk through sustained postweaning effects on insulin sensitivity. *Am J Physiol Endocrinol Metab* 2017;312:E215–E223
- Kramer CK, Swaminathan B, Hanley AJ, et al. Each degree of glucose intolerance in pregnancy predicts distinct trajectories of  $\beta$ -cell function, insulin sensitivity, and glycemia in the first 3 years postpartum. *Diabetes Care* 2014;37:3262–3269
